# Supplementary material for: High Harvest Yield, High Expansion, and Phenotype Stability of CD146 Mesenchymal Stromal Cells from Whole Primitive Human Umbilical Cord Tissue
Source: Hindawi journal article supplement (doi:10.1155/2009/789526), 2009-01-01
Supplement: f2 [file 789526.f2.pdf]

| <b>Supplementary Table 1. Parameter</b> |                                                                  | <b>Measurement</b>                                 |
|-----------------------------------------|------------------------------------------------------------------|----------------------------------------------------|
| <b>Total cord</b>                       | Mean Length of Human Umbilical Cord (cm)                         | 30 – 60                                            |
|                                         | ① Mean Diameter of Human Umbilical Cord (cm)                     | 1.3 ± 0.25                                         |
| <b>Vessels-artery</b>                   | ② Diameter (cm)                                                  | 0.204 ± 0.007                                      |
|                                         | ③ Wall thickness (cm)                                            | 0.080 ± 0.008                                      |
|                                         | Area of artery (cm <sup>2</sup> )                                | 0.033 ± 0.006                                      |
|                                         | ④ Area of artery lumen (cm <sup>2</sup> , fixed section)         | 0.0009 ± 0.0005                                    |
|                                         | Mean Intercellular Distance (um)                                 | 24.0 ± 3.6                                         |
| <b>Vessel-vein</b>                      | ⑤ Diameter (cm)                                                  | 0.355 ± 0.019                                      |
|                                         | ⑥ Wall thickness (cm)                                            | 0.0598 ± 0.019                                     |
|                                         | Area of vein (cm <sup>2</sup> )                                  | 0.081 ± 0.01                                       |
|                                         | ⑦ Area of vein lumen (cm <sup>2</sup> , fixed section)           | 0.0180 ± 0.0005                                    |
|                                         | Mean Intercellular Distance (um)                                 | 27.0 ± 3.3                                         |
| <b>Perivascular, PV, region</b>         | ⑧ Radial distance (um) or thickness (um)                         | 430 ± 120                                          |
|                                         | Area of region (cm <sup>2</sup> )                                | 0.013 ± 0.002                                      |
|                                         | Mean Intercellular Distance (um)                                 | 50.1 ± 4.7                                         |
| <b>Wharton's Jelly region 1</b>         | ⑨ Diameter of region 1, cm                                       | 0.91                                               |
|                                         | Mean Intercellular Distance (um)                                 | 81.2 ± 16.1                                        |
| <b>region 2</b>                         | ⑩ Diameter of region 2, cm (same as UC diameter)                 | 1.30 ± 0.25                                        |
|                                         | Mean Intercellular Distance (um)                                 | 105.7 ± 5.4                                        |
| <b>Cell Estimates</b>                   | Vessels, Theoretical Total Number of Cells per gram              | <b>8.1 x 10<sup>6</sup> – 8.9 x 10<sup>6</sup></b> |
|                                         | Perivascular Regions, Theoretical Total Number of Cells per gram | <b>~1 x 10<sup>6</sup></b>                         |
|                                         | Wharton's Jelly, Theoretical Total Number of Cells per gram      | <b>1.3 x 10<sup>6</sup> – 1.4 x 10<sup>6</sup></b> |

Volumetric cell densities are based on body-centered closed packing and face-centered closed packing models using the mean intracellular distance obtained from images of 10-micron thick sections. Within the Wharton's Jelly, there are 2 regions with significantly different cell distributions; region 1 immediately surrounds the vessels as shown in this figure below, while region 2 is the outer ring of the UC cross-section. Values are based on measurements taken from images of frozen sections stained with Hoechst. Physical measurements are mean ± standard deviation obtained from n = 4 UC samples.

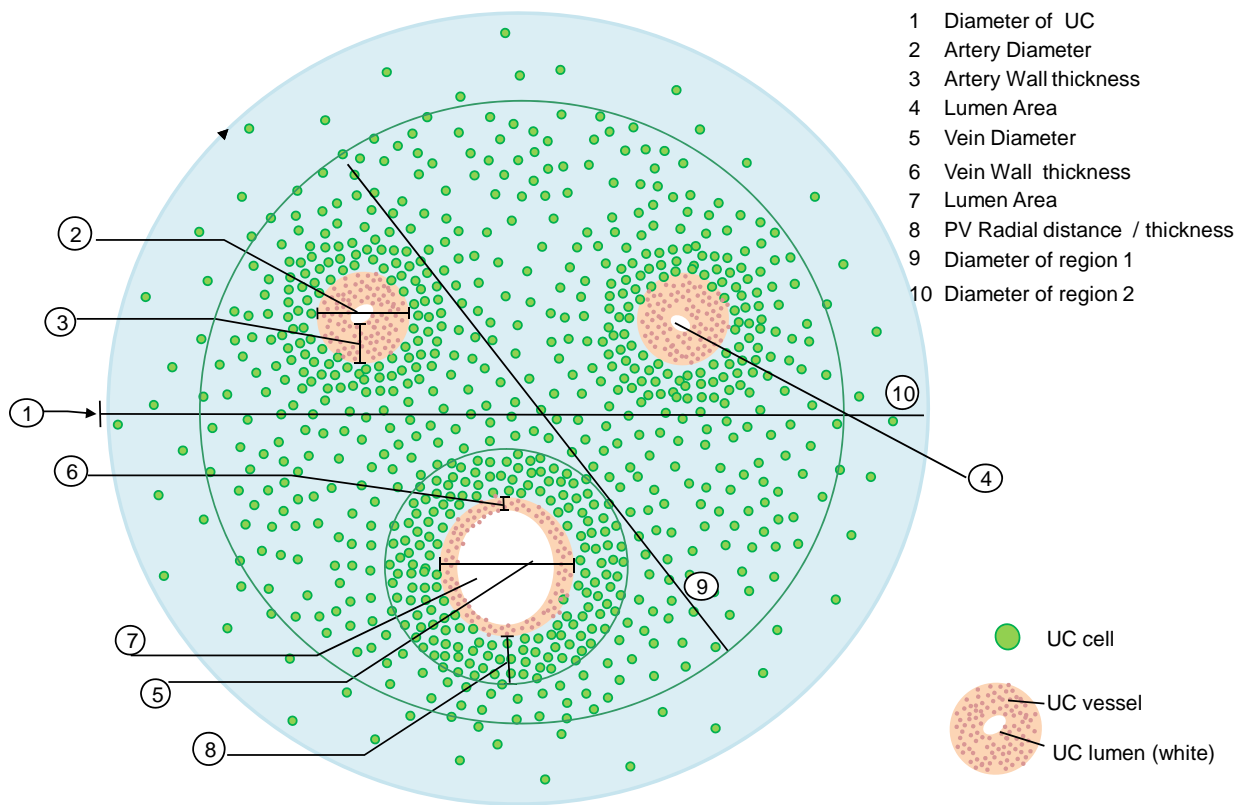

**Supplementary Table 1**
